# Supplementary material
Source: PubMed Central journal article supplement (PMC4324565)
Supplement: NIHMS645884-supplement.pdf [file NIHMS645884-supplement.pdf]

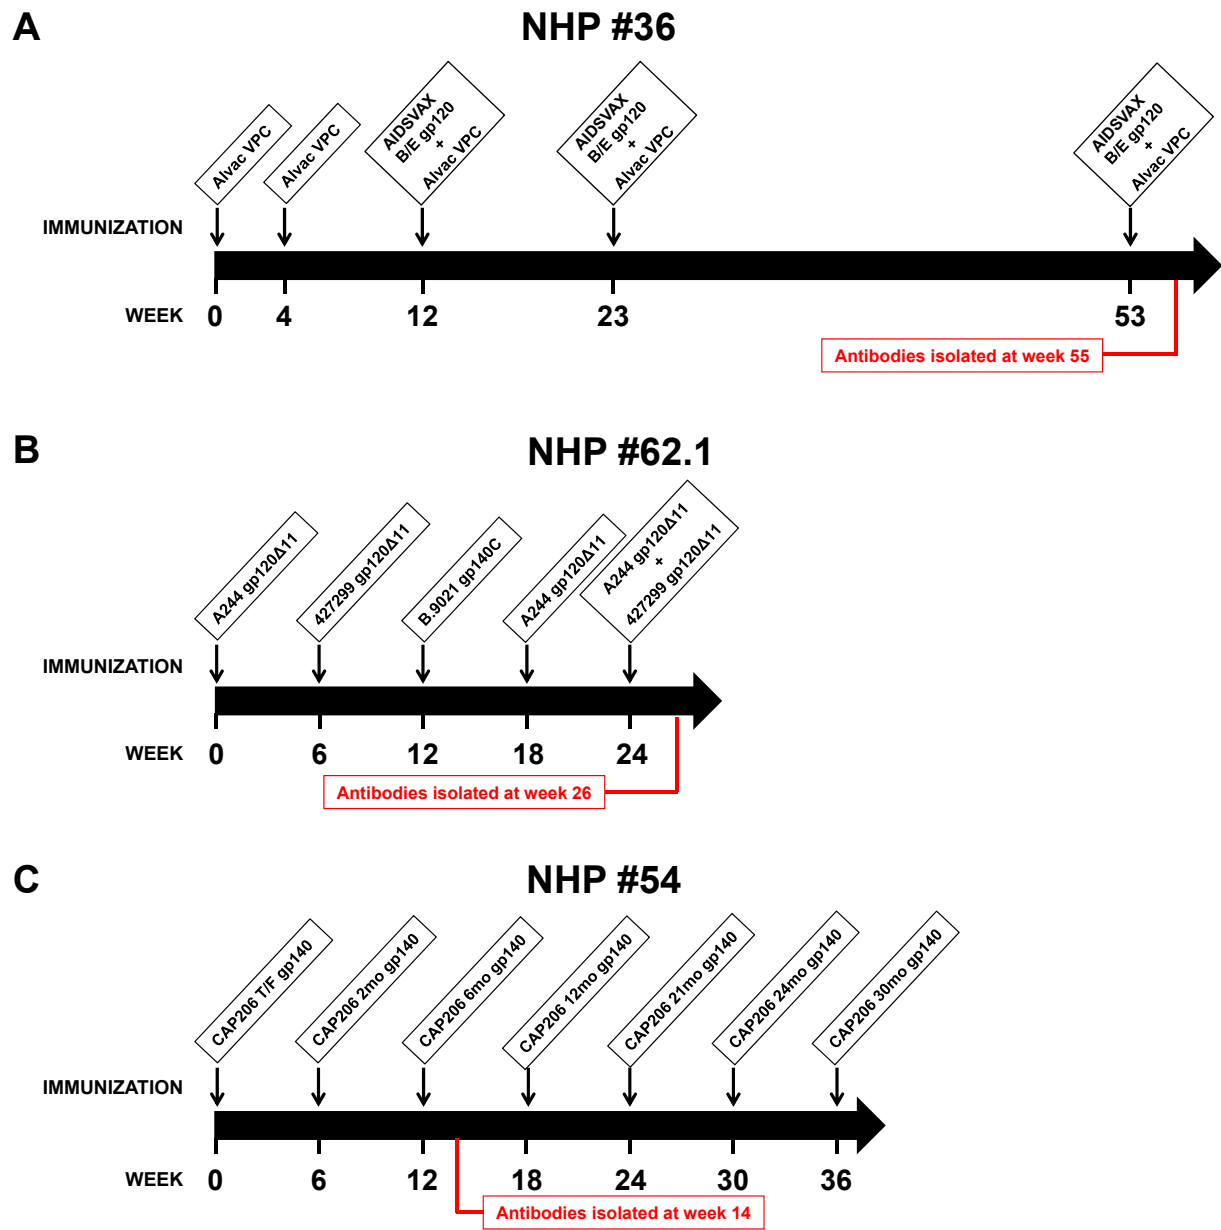

**Figure S1. Immunization regimens for the three NHP studies (Related to Fig. 1)**

Regimens for (A) NHP #36 (B) NHP #54 and (C) NHP #62.1. Immunogens are listed in angled boxes above black horizontal arrows and corresponding times of immunization are listed below. Time of antibody isolation is indicated by a red box and line.

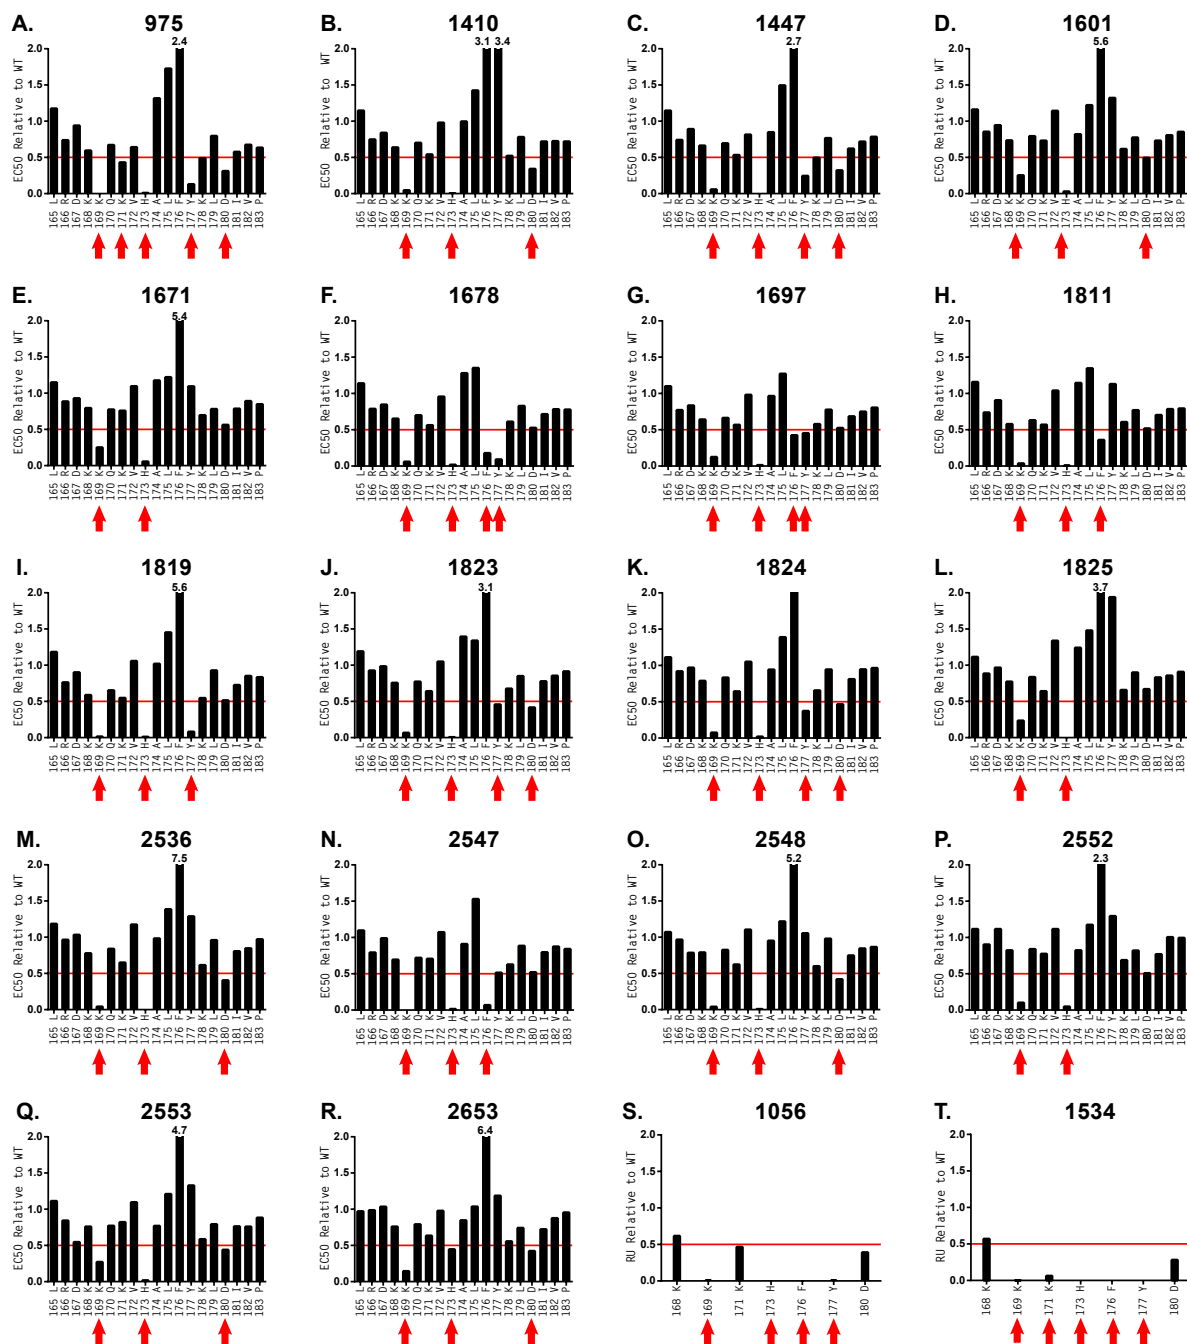

**Figure S2. Epitope mapping of purified V2 antibodies (related to Table 1)**

Purified antibodies were epitope mapped by alanine scanning mutations on the 171 V2 peptide. Red arrows indicate >50% reduction in binding (red line) of alanine scanning mutation at specified position relative to wild type peptide binding as measured by ELISA (EC<sub>50</sub>) (panels A-R) or SPR (Response Units) (panels S-T). Values listed are averages of measurements run in duplicate. For ease of comparison, scale of y-axis is set at 2.0 with values >2 listed above bars.

| Species                    | AA/Codon                      |
|----------------------------|-------------------------------|
|                            | <b>50 51</b>                  |
| <i>Homo sapiens</i>        | E D<br>gag gac                |
| <i>Pan troglodytes</i>     | E D<br>gag gac                |
| <i>Pan paniscus</i>        | E D<br>gag gac                |
| <i>Gorilla gorilla</i>     | E D<br>gag gac                |
| <i>Pongo abelii</i>        | <b>K</b> D<br><b>a</b> ag gac |
| <i>Nomascus leucogenys</i> | E D<br>gag gac                |
| <i>Papio anubis</i>        | E D<br>gag gac                |
| <i>Macaca mulatta</i>      | E D<br>gag gac                |
| <i>Callithrix jacchus</i>  | E D<br>gaa gac                |
| <i>Saimiri boliviensis</i> | <b>Q</b> D<br><b>ca</b> a gat |
| <i>Tarsius syrichta</i>    | E D<br>gaa gat                |
| <i>Microcebus murinus</i>  | E D<br>gag gat                |
| <i>Otolemur garnetti</i>   | E D<br>gaa gat                |

**Figure S3. Codon usage in ED motif in IGLV3-10 primate orthologs (Related to Fig. 5)**

The use of synonymous codons in primate orthologs of human IGLV3-10 encoding glutamic acid and aspartic acid (ED) at positions 50 and 51 suggests evidence of selective pressure for maintenance of LCDR2 ED motif in the primate lineage. Amino acids (uppercase) and DNA codons (lowercase) that differ from human are shown in red.

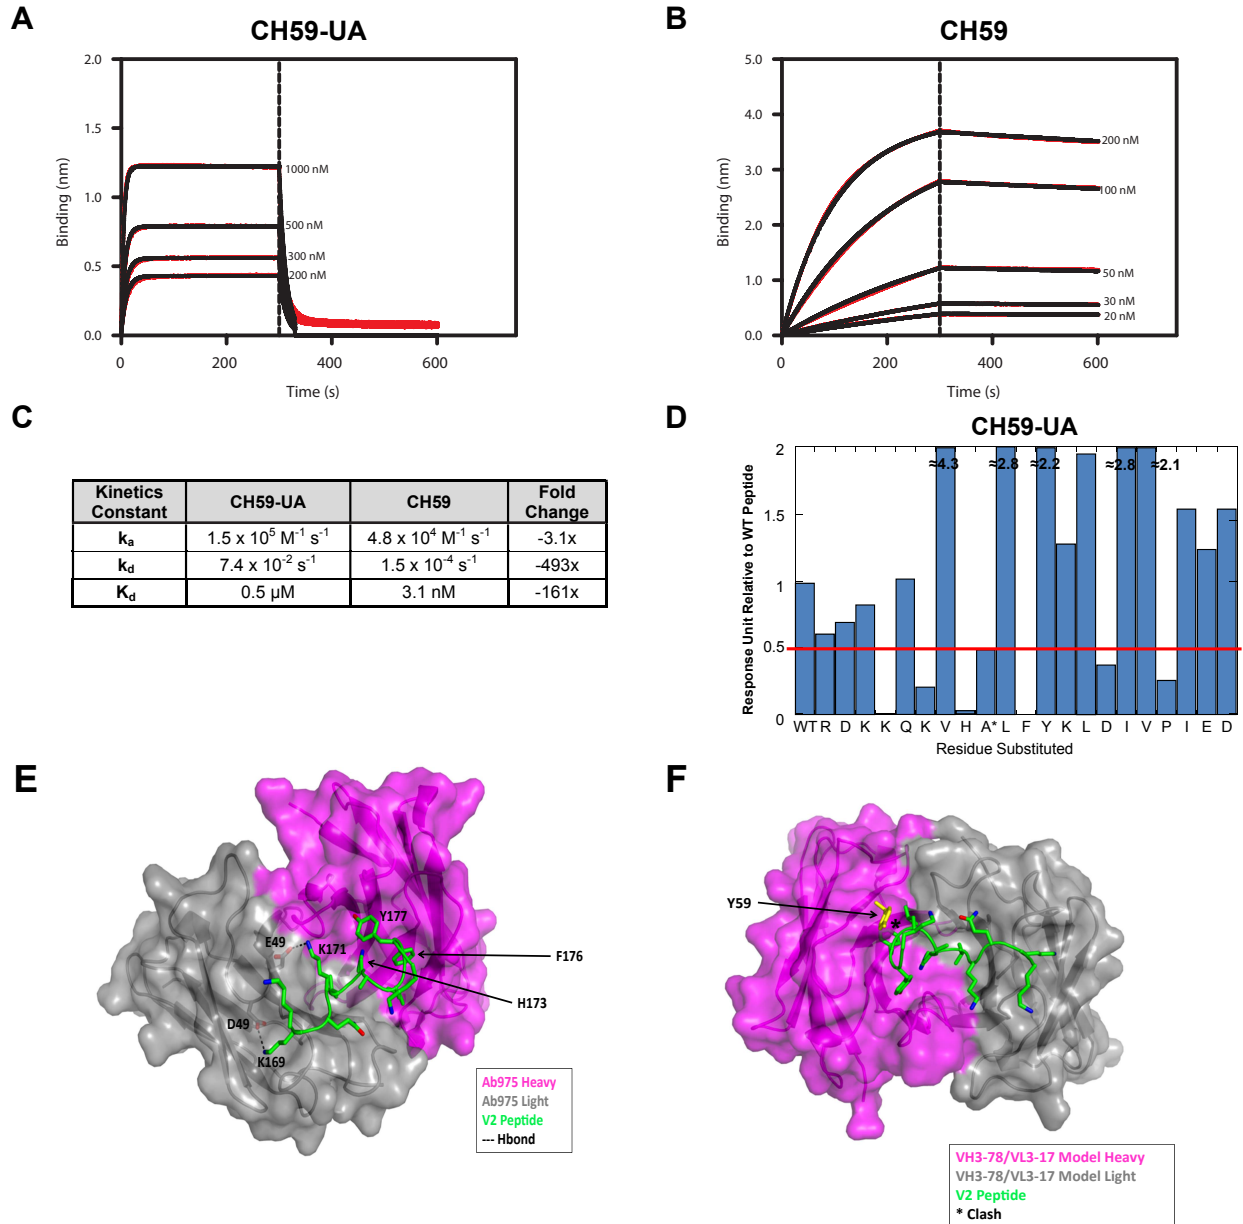

**Figure S4. Structural models and binding kinetics of CH59-UA (Related to Fig. 6)**

Representative bio-layer interferometry sensograms (red) and the best fit (black) are shown for the binding between wild type 171 V2 peptide and (A) CH59-UA and (B) CH59. (C) The binding kinetics parameters of CH59-UA and CH59 interactions with wild type 171 peptide are compared. The on-rate ( $k_a$ ), off-rate ( $k_d$ ) and dissociation constant ( $K_d$ ) values were obtained by global fitting of specific binding sensograms to a 1:1 binding model and values listed are averages of triplicate measurements. (D) Epitope mapping of CH59-UA carried out using SPR measurements of alanine scans of AE.A244 gp120166-186 peptide binding of CH59-UA. Red line denotes 50% reduction in binding relative to WT peptide. Asterisk denotes alanine to glutamine mutation. To focus on epitope positions where binding decreased, the scale of y-axis is set at 2.0 with values  $>2$  listed next to bars. Structural models of complexes of V2 peptide (green) and (E) rhesus antibody 975 and (F) a rhesus antibody with an unmutated IGHV3-78/IGLV3-17 pairing. In each model, the heavy chain (magenta) and light chain (gray) are shown in cartoon representation with a transparent surface overlaid to illustrate binding site shape. Predicted salt bridge interactions of the ED motif are shown by dashed black lines. The predicted steric clash between residue Y59 (yellow, stick representation) in the HCDR2 of IGHV3-78 and the V2 peptide is denoted by an asterisk.

**A**

| VL       | Ab/Gene | Amino Acid Sequence                                                                                       |
|----------|---------|-----------------------------------------------------------------------------------------------------------|
| IGLV3-10 | CH69    | SYELTQPPSVSPGQTARITCSGDALPKNVAYWYQKSGQAPVLVIYEDSKRPSGIPEFRFSGSSGTMATLTIISGAQVEDEADYCYSTDSNGNHRVFGGTRKLTVL |
| IGLV3-10 | CH59_UA | .....K.....ED.....                                                                                        |
| IGLV3-10 | VL gene | .....K.....                                                                                               |
| IGLV3-17 | VL gene | .....K.....F.P.S.I.I.....V.....                                                                           |
| IGLV3-17 | 1678    | .....F.P.S.G.I.....V.....F.NI.V.R.....                                                                    |
| IGLV3-17 | 1695    | .....F.RP.S.I.I.EDT.....T.I.I.....V.....A.....DT.NT.A.R.....                                              |
| IGLV3-17 | 1697    | .....F.P.S.G.I.EDT.....V.....G.....L.N.L.R.....                                                           |
| IGLV3-17 | 1803    | .....F.P.S.I.I.FEDT.....T.I.I.....V.....A.....DT.NT.A.R.....                                              |
| IGLV3-17 | 1811    | .....K.V.F.P.S.A.I.EDTR.....Q.A.V.....F.NI.A.R.....                                                       |
| IGLV3-17 | 1614    | .....EK.....F.S.S.I.EDN.....T.V.....G.....V.Y.SL.R.....                                                   |
| IGLV3-17 | 1669    | .....EK.F.K.P.S.I.EDN.....V.....T.....G.....A.T.Y.TI.R.....                                               |
| IGLV3-17 | 1912    | .....EK.....F.P.S.I.I.EDN.....V.....S.....A.YQS.R.....                                                    |
| IGLV3-17 | 1410    | .....EK.FH.P.S.I.EDN.....V.....G.....A.Y.TI.R.....                                                        |
| IGLV3-17 | 1816    | .....K.G.F.P.SL.I.EDN.....T.....AV.....N.....F.....NT.D.A.R.....                                          |
| IGLV3-17 | 1825    | .....K.....F.P.S.I.I.ED.....T.....V.....G.....Y.AL.R.....                                                 |
| IGLV3-17 | 2630    | .....K.F.P.S.I.ED.....S.....V.....F.....F.Y.PI.R.....                                                     |
| IGLV3-17 | 1601    | .....S.....K.....F.P.S.I.I.EDN.....V.....G.....A.YQT.V.R.....                                             |
| IGLV3-17 | 1671    | .....P.....EKF.....F.S.S.I.ED.....IV..AL.....S.YQT.R.....                                                 |
| IGLV3-17 | 2212    | .....K.....F.T.S.A.IV.ED.....F.X.....V.....F.A.YQSI.T.R.....                                              |
| IGLV3-17 | 2553    | .....EK.....F.P.S.I.ED.R.....V.S.....F.A.T.T.TI.R.....                                                    |
| IGLV3-17 | 975     | .....EK.....F.P.S.I.EDN.....V.....FF.....Y.D.SI.P.R.....                                                  |
| IGLV3-17 | 1447    | .....EK.F.RP.S.I.EDN.....V.....S.....D.SI.T.R.....                                                        |
| IGLV3-17 | 1819    | .....D.....K.....F.P.S.I.M.EDT.....V.....F.....A.TTDYRAL.R.....                                           |
| IGLV3-17 | 1823    | .....FH.P.S.I.EDN.....V.....E.SI.A.R.....                                                                 |
| IGLV3-17 | 1824    | .....EK.....F.P.S.T.EDT.....V.....G.....S.SI.A.R.....                                                     |
| IGLV3-17 | 2201    | .....S.....T.EK.F.A.S.I.EDN.....V.....T.....H.A.S.TI.A.R.....                                             |
| IGLV3-17 | 2536    | .....TK.....F.P.S.I.ED.R.P.....V.N.G.....V.YNSL.R.....                                                    |
| IGLV3-17 | 2547    | .....M.....K.....F.P.S.I.ED.....V.....G.....A.YNVL.R.....                                                 |
| IGLV3-17 | 2653    | .....EK.....F.P.S.I.EDN.....V.....L.....A.YQT.R.....                                                      |
| IGLV3-17 | 2548    | .....EK.....F.K.P.S.I.EDN.....V.....G.....A.F.TF.R.....                                                   |

# B

| Species | VH         | Ab/Gene | Amino Acid Sequence                                                                                                                      |
|---------|------------|---------|------------------------------------------------------------------------------------------------------------------------------------------|
| human   | IGHV3-9    | CH59    | EVQLVESGGGLVQPGSRSLRLSCAASGFTT-DDGAM-HWVRQAPFGKLEWVSGISWNSNLSIAVADSVKGRFTISRDNAKNSLYLEMNISLRVEDTALYYCAK <b>Q</b> SPR--GELPLINWGGQGLVTVSS |
| human   | IGHV3-9    | CH59_UA | .....Y..... <b>GS</b> .G..... <b>D</b> .....A..... <b>D</b> ..... <b>FD</b> .....                                                        |
| rhesus  | IGHV3-SC11 | VH gene | EVQLVESGGGLAKPGSRSLRLSCAASGFTF-SSYWM-NWVRQTEPKGLEWISAINSGGSGTYADSVKGRFTISRDNSKNTLSLQNSLRADDTAVYCAK                                       |
| rhesus  | IGHV3-SC11 | 1678    | D.H.....V.....RS...DSV...H.....R.....VA.FR...K.F.....F.....S.....S.....E.....IA..... <b>TE</b> DDG...LDRLVWGGQGLVTVSS                    |
| rhesus  | IGHV3-SC11 | 1695    | Q.....V.....T.L.F.H.....S.....V.....GR...V.F.RA.....H.....V.....P.....F.....F..... <b>ED</b> GDTE.GTFLPDSWGGQGLVTVSS                     |
| rhesus  | IGHV3-SC11 | 1697    | D.H.....V.....RS...DSV...H.....R.....VA.FRT...K.F.....F.....S.....S.....E.....IA..... <b>ED</b> GG...LDRLVWGGQGLVTVSS                    |
| rhesus  | IGHV3-SC11 | 1803    | .....V.....N.L.F.H.....S.....V.....GR...V.F.R.....H.....V.....P.....F.....F..... <b>ED</b> GDTE.GTFLPDSWGGQGLVTVSS                       |
| rhesus  | IGHV3-SC11 | 1811    | D.....V.....NSA...H.....R.....VA.FSP...F.T.....I.....R.....TS.....E.....TD..... <b>ED</b> DG...LDRLVWGGQGLVTVSS                          |
| rhesus  | IGHV4-48   | VH gene | QVQLQESGPGLVKPESETLSLTCAVSGGSI-SG-YYNWIRQPPKGLEWIGYIGSSGTYNPSLKSRVTISDTSKNQFSLKSSVTAADTAVYCAR                                            |
| rhesus  | IGHV4-48   | 1614    | .....V.E.....D.....P.L.T.....N.....GR...N.S.....N.....R.....R.....N.....H.....T.....L..... <b>TD</b> SMGV.EQLPLVWGGQGLVTVSS              |
| rhesus  | IGHV4-48   | 1669    | .....V.....D.....Y.L.T.....N.....G.....N.....N.....R.....R.....H.....T.....T..... <b>TD</b> SMGV.EQLPLVWGGQGLVTVSS                       |
| rhesus  | IGHV4-48   | 1912    | .....M.N.....S.G.....N.F.L.S.....N.....GR.I.N.S.....K.....E.....RMRT.N.S..... <b>TD</b> SRDY.DQLPLTYWGPGLVTVSS                           |
| rhesus  | IGHV4-48   | 2552    | .....V.....D.....T.L.T.....N.....N.....G.A.R.N.....N.....R.....R.....L.....T.....T..... <b>TD</b> SMGM.EQLPLVWGGQGLVTVSS                 |
| rhesus  | IGHV4-48   | 1410    | .....M.....D.....Y.L.T.....N.....NI...N.....T.....K.....N.....R.....R..... <b>TD</b> GHD...TDLPLHWGGQGLVTVSS                             |
| rhesus  | IGHV4-48   | 1816    | .....M.....V.....Y.L.S.....N.....NI...N.....T.....K.....I.....S.....R.....L..... <b>TD</b> GHD...TDLPLHWGGQGLVTVSS                       |
| rhesus  | IGHV4-48   | 1825    | .....R.....V.....Y.L.S.....N.....NI...N.....T.....K.....N.....R.....R..... <b>TD</b> GGD...TDLPLHWGGQGLVTVSS                             |
| rhesus  | IGHV4-48   | 2630    | .....R.....Y.L.S.....N.....NL...N.....K.....N.....R.....R.....M..... <b>TD</b> GHD...TDLPLHWGGQGLVTVSS                                   |
| rhesus  | IGHV4-79   | VH gene | QVQLQESGPGLVKPESETLSLTCAVSGYSI-SSGYGWSWIRQPPKGLEWIGYIGSSGTYNPSLKSRVTISKDTSKNQFSLKSSVTAADTAVYCAR                                          |
| rhesus  | IGHV4-79   | 1601    | .....H.....V.....S.....V.....T.G.Y.L.L.....V.....TG.TS.V.....N.....N.....R.....E.....R..... <b>TD</b> SG...DTYPLWGGQGLVTVSS              |
| rhesus  | IGHV4-79   | 1671    | .....K.....IMR.....G.....G.P.L.T.....S.....N.....GR.T.....F.N.A.....LL...E.R..... <b>TD</b> SMGV.EQLPLVWGGQGLVTVSS                       |
| rhesus  | IGHV4-79   | 2212    | .....V.....R.....T.G.Y.L.L.T.....N.....N.....T.G.T.....N.....P.....F.....H.....R.....N..... <b>TD</b> RD...SDCPIDYWGQGLVTVSP             |
| rhesus  | IGHV4-79   | 2553    | .....V.....G.V.GS.L.L.F.....N.....N.....C.R.R.....V.....Y.....I..... <b>TD</b> SGWQQLPLVWGGQGLVTVSS                                      |
| rhesus  | IGHV4-79   | 975     | .....V.....G.V.GY.L.L.L.....S.....C.....R.....R.....N.....R.....I..... <b>TD</b> SGWQQLPLVWGGQGLVTVSS                                    |
| rhesus  | IGHV4-79   | 1447    | .....V.....D.....G.V.GY.L.L.L.....S.....C.....R.....R.....N.....M..... <b>TD</b> DD...KAEALDYWGQGLVTVTS                                  |
| rhesus  | IGHV4-79   | 1819    | .....V.....D.....D.V.GY.L.L.L.....S.....C.....R.....R.....N.....I.....M..... <b>TD</b> RN...TDIDYWGRGVLTVSS                              |
| rhesus  | IGHV4-79   | 1823    | .....V.....A.V.GY.L.L.L.....S.....M.C.R.R.N.....T.....I.....I..... <b>TD</b> G...KAEALDYWGQGLVTVSS                                       |
| rhesus  | IGHV4-79   | 1824    | .....V.....G.....G.L.T.....N.....N.....C.G.GGT.N.....S.N..... <b>TD</b> L...ESLALYWGQGLVTVSS                                             |
| rhesus  | IGHV4-96   | VH gene | QVQLQESGPGLVKPESETLSLTCAVSGGSI-SDYNYWIRQPPKGLEWIGYIGSNLYGNISATYINPSLKSRVTISKDTSKNQFSLKSSVTAADTAVYCAR                                     |
| rhesus  | IGHV4-96   | 2201    | .....V.M.....G.....G.L.T.....N.....N.....C.G.GGT.N.....S.N..... <b>TD</b> SKAVEBELPLVWGGQGLVTVSS                                         |
| rhesus  | IGHV4-96   | 2536    | .....M.....G.....L.T.....V.....G.....R.G.H.S.....N..... <b>TD</b> LG...LELPLYWGQGLVTVSS                                                  |
| rhesus  | IGHV4-96   | 2547    | .....V.....V.....G.L.S.....ART.GD.H.....H.....S.....L.....L..... <b>TD</b> SMGM.EQLPLVWGGQGLVTVSS                                        |
| rhesus  | IGHV4-96   | 2653    | .....K.....A.....GS.L.T.....V.....RGGT.N.S.....A.....S.E.R..... <b>TD</b> SMGM.EQLPLVWGGQGLVTVSS                                         |
| rhesus  | IGHV4-96   | 2548    | .....V.....A.....D.....G.....G.T.N.....N.....R.....H.....S.....T.....S..... <b>TD</b> SMGV.EQLPLVWGGQGLVTVSS                             |

**Figure S5. Multiple sequence alignments of rhesus antibodies using the IGLV3-17 gene segment (Related to Fig. 3)**

Multiple sequence alignments for antibody (A) light chain amino acid sequences and (B) heavy chain amino acid sequences. Dots denote matches to reference sequence (gray fill). CDRs are shaded light blue and the LCD2 ED motif (red) has been bolded for emphasis.

**Table S1. ELISA Binding Data for V2-reactive Rhesus Antibodies, Unmutated Common Ancestors and ED Motif Alanine Mutations (Related to Fig 3)**

**A.**

| mAb ID | Contains CDRL2 ED Motif? | Transient Transfection |                      |                                                | Purified mAb                                    |
|--------|--------------------------|------------------------|----------------------|------------------------------------------------|-------------------------------------------------|
|        |                          | AE A244 V1V2 Tags (OD) | A244 V2 Peptide (OD) | K169A:WT Ratio (AUC rel to WT A244 V2 Peptide) | K169A:WT Ratio (EC50 rel to WT A244 V2 Peptide) |
| 975    | Yes                      | 3.561                  | 3.522                | 0.084                                          | 0.000                                           |
| 1410   | Yes                      | 3.560                  | 3.659                | 0.159                                          | 0.046                                           |
| 1447   | Yes                      | 3.499                  | 0.351                | 0.220                                          | 0.057                                           |
| 1601   | Yes                      | 3.599                  | 1.899                | 0.296                                          | 0.253                                           |
| 1671   | Yes                      | 3.664                  | 3.341                | 0.223                                          | 0.251                                           |
| 1678   | Yes                      | 3.632                  | 3.284                | 0.252                                          | 0.059                                           |
| 1697   | Yes                      | 3.570                  | 3.387                | 0.366                                          | 0.124                                           |
| 1811   | Yes                      | 3.584                  | 3.214                | 0.119                                          | 0.037                                           |
| 1819   | Yes                      | 3.816                  | 3.515                | 0.096                                          | 0.015                                           |
| 1823   | Yes                      | 3.937                  | 3.619                | 0.230                                          | 0.066                                           |
| 1824   | Yes                      | 3.560                  | 2.577                | 0.159                                          | 0.074                                           |
| 1825   | Yes                      | 3.398                  | 2.857                | 0.975                                          | 0.235                                           |
| 2536   | Yes                      | 3.501                  | 3.230                | 0.104                                          | 0.041                                           |
| 2547   | Yes                      | 3.521                  | 3.201                | 0.050                                          | 0.000                                           |
| 2548   | Yes                      | 3.536                  | 3.177                | 0.077                                          | 0.040                                           |
| 2552   | Yes                      | 3.663                  | 3.596                | 0.267                                          | 0.101                                           |
| 2553   | Yes                      | 3.657                  | 3.608                | 0.415                                          | 0.271                                           |
| 2653   | Yes                      | 3.658                  | 3.672                | 0.277                                          | 0.144                                           |
| 1614   | Yes                      | 3.670                  | 3.388                | 0.416                                          | N/A                                             |
| 1669   | Yes                      | 3.608                  | 3.389                | 0.182                                          | N/A                                             |
| 1695   | Yes                      | 3.561                  | 3.226                | 0.165                                          | N/A                                             |
| 1803   | Yes                      | 3.635                  | 3.310                | 0.135                                          | N/A                                             |
| 1816   | Yes                      | 3.937                  | 3.532                | 0.281                                          | N/A                                             |
| 1912   | Yes                      | 3.557                  | 3.310                | 0.410                                          | N/A                                             |
| 2201   | Yes                      | 3.502                  | 3.174                | 0.057                                          | N/A                                             |
| 2212   | Yes                      | 3.538                  | 3.317                | 0.354                                          | N/A                                             |
| 2630   | Yes                      | 3.937                  | 3.367                | 0.497                                          | N/A                                             |
| 1510   | No                       | 3.480                  | 1.182                | 0.985                                          | N/A                                             |
| 1806   | No                       | 3.557                  | 3.145                | 0.862                                          | N/A                                             |
| 1809   | No                       | 3.561                  | 3.179                | 0.822                                          | N/A                                             |
| 1918   | No                       | 3.600                  | 3.290                | 0.937                                          | N/A                                             |
| 2090   | No                       | 3.937                  | 3.416                | 0.833                                          | N/A                                             |
| 2102   | No                       | 3.937                  | 2.676                | 0.899                                          | N/A                                             |
| 2550   | No                       | 3.744                  | 2.876                | 0.610                                          | N/A                                             |
| 2551   | No                       | 3.206                  | 0.800                | 1.083                                          | N/A                                             |
| 2554   | No                       | 3.628                  | 3.685                | 0.958                                          | N/A                                             |
| 2840   | No                       | 3.647                  | 3.369                | 0.773                                          | N/A                                             |
| 2847   | No                       | 3.548                  | 3.377                | 0.944                                          | N/A                                             |
| 2857   | No                       | 3.709                  | 3.246                | 0.785                                          | N/A                                             |

39 rhesus antibodies were classified as V2-reactive if OD for binding to AE.A244 V1V2 tags protein was >1 and OD to the AE.A244 V2 peptide (LRDKKQKVHALFYKLDIVPIED) was >0.3. Antibody recognition of K169 (highlighted in yellow) was established if K169A mutation resulted in >50% reduction in binding relative to wildtype AE.A244 V2 171 peptide (expressed here by a K169A:WT ratio <0.5 ) for either transiently transfected antibody (as measured by AUC of ODs at three concentrations) or as purified antibody (as measured by EC50).

**B.**

| <b>Antibody</b>       | <b>EC50 (ug/ml)</b> |                  |                   |
|-----------------------|---------------------|------------------|-------------------|
|                       | <b>A244 gp120</b>   | <b>V1V2 Tags</b> | <b>V2 Peptide</b> |
| <b>1518</b>           | 0.009               | 0.011            | 0.747             |
| <b>1518 D51A</b>      | 0.093               | 0.023            | 3.299             |
| <b>1518 E50A+D51A</b> | 0.479               | 0.109            | 21.265            |

**C.**

| <b>Clone #<sup>1</sup></b> | <b>Members</b>   | <b>VH</b> | <b>VL</b> | <b>V1V2 Tags EC50 (ug/ml)</b> |                            |
|----------------------------|------------------|-----------|-----------|-------------------------------|----------------------------|
|                            |                  |           |           | <b>UCA</b>                    | <b>Mutated<sup>2</sup></b> |
| 1                          | 1678, 1697, 1811 | VH3-SC11  | Vλ3-17    | 0.003                         | 0.005                      |
| 5                          | 1825, 2630       | VH4-48    | Vλ3-17    | 6.713                         | 0.006                      |
| 15                         | 2653, 2548       | VH4-96    | Vλ3-17    | 48.132                        | 0.008                      |

<sup>1</sup> See Table S2 for corresponding clone numbers

<sup>2</sup> Values represent min EC50 of clonal members



**Table S2. Characteristics of All V2 Antibodies in Study (Related to Fig. 1)**

| mAb ID | NHP Study | Animal Number | Iso-type | Clone # | HEAVY      |           |                             |              | LIGHT      |           |                             |              |                |
|--------|-----------|---------------|----------|---------|------------|-----------|-----------------------------|--------------|------------|-----------|-----------------------------|--------------|----------------|
|        |           |               |          |         | VH         | JH        | heavy mut freq <sup>1</sup> | HCDR3 length | VL         | JL        | light mut freq <sup>1</sup> | LCDR3 Length | LCDR2 Sequence |
| 1678   | 36        | RhM22-11      | G        | 1       | IGHV3-SC11 | IGHJ4-4   | 16.5%                       | 12           | IGLV3-17   | IGLJ1-LC1 | 2.6%                        | 11           | IIYEDSK        |
| 1697   | 36        | RhM22-11      | G        | 1       | IGHV3-SC11 | IGHJ4-4   | 16.5%                       | 12           | IGLV3-17   | IGLJ1-LC1 | 3.8%                        | 11           | IIYEDTK        |
| 1811   | 36        | RhM22-11      | G        | 1       | IGHV3-SC11 | IGHJ4-4   | 16.5%                       | 12           | IGLV3-17   | IGLJ1-LC1 | 4.5%                        | 11           | IIYEDTR        |
| 1695   | 36        | RhM22-11      | G        | 2       | IGHV3-SC11 | IGHJ4-4   | 11.4%                       | 14           | IGLV3-17   | IGLJ1-LC1 | 4.5%                        | 11           | IIYEDTK        |
| 1803   | 36        | RhM22-11      | A        | 2       | IGHV3-SC11 | IGHJ4-4   | 10.7%                       | 14           | IGLV3-17   | IGLJ1-LC1 | 4.5%                        | 11           | IIYEDTK        |
| 1056   | 54        | RhM5103       | G        | 3       | IGHV3-SC11 | IGHJ5-LC1 | 5.7%                        | 11           | IGLV3-SC4  | IGLJ2-2   | 1.1%                        | 11           | VIYEDSE        |
| 1534   | 54        | RhM5103       | G        | 3       | IGHV3-SC11 | IGHJ5-LC1 | 7.9%                        | 11           | IGLV3-SC4  | IGLJ2-2   | 0.7%                        | 11           | VIYEDSE        |
| 1669   | 36        | RhM46-11      | G        | 4       | IGHV4-48   | IGHJ5-LC1 | 8.3%                        | 14           | IGLV3-17   | IGLJ2-2   | 4.8%                        | 11           | IIYEDNK        |
| 1912   | 36        | RhM46-11      | G        | 4       | IGHV4-48   | IGHJ5-LC1 | 17.1%                       | 14           | IGLV3-17   | IGLJ2-2   | 5.2%                        | 11           | IIYEDNK        |
| 2552   | 36        | RhM46-11      | G        | 4       | IGHV4-48   | IGHJ5-LC1 | 12.4%                       | 14           | IGLV3-17   | IGLJ2-2   | 5.2%                        | 11           | IIYEDNK        |
| 1614   | 36        | RhM46-11      | G        | 4       | IGHV4-48   | IGHJ5-LC1 | 11.2%                       | 14           | IGLV3-17   | IGLJ2-2   | 5.3%                        | 11           | IIYEDNK        |
| 1825   | 62.1      | RhM5107       | G        | 5       | IGHV4-48   | IGHJ4-4   | 8.0%                        | 13           | IGLV3-17   | IGLJ2-2   | 3.1%                        | 11           | IIYEDSK        |
| 2630   | 62.1      | RhM5107       | G        | 5       | IGHV4-48   | IGHJ4-4   | 7.7%                        | 13           | IGLV3-17   | IGLJ2-2   | 4.2%                        | 11           | IIYEDSK        |
| 1410   | 62.1      | RhM5107       | G        | 5       | IGHV4-48   | IGHJ4-4   | 7.0%                        | 13           | IGLV3-17   | IGLJ2-2   | 3.4%                        | 11           | IIYEDTK        |
| 1816   | 62.1      | RhM5107       | G        | 5       | IGHV4-48   | IGHJ4-4   | 9.1%                        | 13           | IGLV3-17   | IGLJ2-2   | 4.5%                        | 11           | IIYEDNK        |
| 1601   | 36        | RhM46-11      | G        | 6       | IHGV4-79   | IGHJ4-4   | 12.3%                       | 12           | IGLV3-17   | IGLJ1-LC1 | 3.8%                        | 11           | IIYEDNK        |
| 1671   | 36        | RhM46-11      | G        | 7       | IHGV4-79   | IGHJ5-LC1 | 15.2%                       | 14           | IGLV3-17   | IGLJ2-2   | 6.1%                        | 11           | IIYEDNK        |
| 2212   | 36        | RhM46-11      | G        | 8       | IHGV4-79   | IGHJ4-4   | 10.4%                       | 12           | IGLV3-17   | IGLJ1-LC1 | 4.5%                        | 11           | IVYEDSK        |
| 2553   | 36        | RhM46-11      | G        | 9       | IHGV4-79   | IGHJ5-LC1 | 13.7%                       | 15           | IGLV3-17   | IGLJ2-2   | 6.3%                        | 11           | IIYEDSR        |
| 1819   | 62.1      | RhM5107       | G        | 10      | IGHV4-79   | IGHJ5-LC1 | 11.2%                       | 12           | IGLV3-17   | IGLJ2-2   | 4.6%                        | 11           | IMYEDTK        |
| 975    | 62.1      | RhM5107       | G        | 11      | IGHV4-79   | IGHJ4-4   | 8.3%                        | 11           | IGLV3-17   | IGLJ1-LC1 | 3.4%                        | 11           | IIYEDNK        |
| 1447   | 62.1      | RhM5107       | G        | 11      | IGHV4-79   | IGHJ4-4   | 9.8%                        | 11           | IGLV3-17   | IGLJ1-LC1 | 3.8%                        | 11           | IIYEDNK        |
| 1823   | 62.1      | RhM5107       | G        | 11      | IGHV4-79   | IGHJ4-4   | 8.3%                        | 11           | IGLV3-17   | IGLJ1-LC1 | 2.6%                        | 11           | IIYEDNK        |
| 1824   | 62.1      | RhM5107       | G        | 11      | IGHV4-79   | IGHJ4-4   | 7.9%                        | 11           | IGLV3-17   | IGLJ1-LC1 | 3.0%                        | 11           | TIYEDTK        |
| 2201   | 36        | RhM46-11      | G        | 12      | IGHV4-96   | IGHJ4-4   | 8.7%                        | 11           | IGLV3-17   | IGLJ1-LC1 | 3.8%                        | 11           | IIYEDNK        |
| 2536   | 36        | RhM46-11      | G        | 13      | IGHV4-96   | IGHJ5-LC1 | 8.7%                        | 15           | IGLV3-17   | IGLJ2-2   | 6.7%                        | 11           | IIYEDSR        |
| 2547   | 36        | RhM46-11      | G        | 14      | IGHV4-96   | IGHJ4-4   | 11.1%                       | 12           | IGLV3-17   | IGLJ2-2   | 4.5%                        | 11           | IIYEDSK        |
| 2653   | 36        | RhM46-11      | G        | 15      | IGHV4-96   | IGHJ5-LC1 | 13.4%                       | 14           | IGLV3-17   | IGLJ2-2   | 5.3%                        | 11           | IIYEDNK        |
| 2548   | 36        | RhM46-11      | G        | 15      | IGHV4-96   | IGHJ5-LC1 | 11.8%                       | 14           | IGLV3-17   | IGLJ2-2   | 5.9%                        | 11           | IIYEDNK        |
| 2857   | 36        | RhM46-11      | G        | 16      | IGHV2-33   | IGHJ4-4   | 7.7%                        | 10           | IGLV1-48   | IGLJ1-LC1 | 10.4%                       | 11           | LIYGSNK        |
| 1809   | 36        | RhM22-11      | G        | 17      | IGHV3-108  | IGHJ4-4   | 5.9%                        | 11           | IGKV2-118  | IGKJ4-LC1 | 1.5%                        | 9            | LIYGGSN        |
| 2551   | 36        | RhM46-11      | G        | 18      | IGHV3-108  | IGHJ4-4   | 10.7%                       | 14           | IGLV1-67   | IGLJ2-2   | 9.4%                        | 11           | LIFQNNK        |
| 1918   | 36        | RhM46-11      | G        | 19      | IGHV3-SC11 | IGHJ4-4   | 14.8%                       | 11           | IGKV2-73   | IGKJ1-5   | 1.8%                        | 9            | LIYEVSN        |
| 2554   | 36        | RhM46-11      | G        | 19      | IGHV3-SC11 | IGHJ4-4   | 14.4%                       | 11           | IGKV2-73   | IGKJ1-5   | 2.5%                        | 9            | LIYEVSN        |
| 1806   | 36        | RhM22-11      | G        | 20      | IGHV3-SC13 | IGHJ4-4   | 8.4%                        | 5            | IGKV2-117  | IGKJ1-5   | 5.9%                        | 9            | LIYRASN        |
| 2102   | 62.1      | RhM5081       | G        | 21      | IGHV3-SC9  | IGHJ4-4   | 4.4%                        | 12           | IGLV3-SC6  | IGLJ2-2   | 5.4%                        | 9            | VTHKDE         |
| 1510   | 36        | RhM46-11      | G        | 22      | IGHV4-100  | IGHJ5-LC1 | 12.8%                       | 18           | IGKV1-LC1g | IGKJ4-LC1 | 6.9%                        | 9            | LIFAASN        |
| 2550   | 36        | RhM46-11      | G        | 23      | IGHV4-100  | IGHJ4-4   | 10.3%                       | 6            | IGLV1-45   | IGLJ1-LC1 | 8.1%                        | 11           | LIYNDR         |
| 2847   | 36        | RhM46-11      | G        | 24      | IGHV4-100  | IGHJ6-6   | 11.9%                       | 16           | IGKV2-118  | IGKJ4-LC1 | 2.6%                        | 9            | LIYGSN         |
| 2090   | 62.1      | RhM5081       | G        | 25      | IGHV4-97   | IGHJ4-4   | 9.4%                        | 9            | IGLV3-SC6  | IGLJ2-2   | 1.6%                        | 9            | IYHDSSE        |
| 2840   | 36        | RhM46-11      | G        | 26      | IGHV5-117  | IGHJ4-4   | 5.6%                        | 13           | IGKV2-73   | IGKJ4-LC1 | 4.7%                        | 9            | LIYMSY         |

1. Mutation frequency reported is an upper-bound estimate given the current incomplete characterization of the rhesus repertoire at the allelic level.

Rows are shaded by study: study #36 (white), study #54 (blue), study #62.1 (gray)

**Table S3. Neutralization Data (Related to Table 1)**

| Antibody             | Study        | IC50 (µg/ml) in TZM-bl Cells <sup>1</sup> |             |             |               |         | IC50 (µg/ml) in A3R5.7 Cells <sup>1</sup> |             |               |               |                 |             |             |
|----------------------|--------------|-------------------------------------------|-------------|-------------|---------------|---------|-------------------------------------------|-------------|---------------|---------------|-----------------|-------------|-------------|
|                      |              | 92TH023.6*                                | MN.3        | CM244.c01*  | MW965.26*     | MLV-SVA | 427299.c12                                | CM244.c01*  | 254010P00Ra.1 | 254007P00Ra.1 | 0503M02138.ec1* | C1080.c03*  | C3347.c11*  |
| 975                  | 62.1         | <b>16.9</b>                               | >50         | >50         | >50           | >50     | >50                                       | >50         | >50           | >50           | >50             | >50         | >50         |
| 1410                 | 62.1         | <b>14.5</b>                               | >50         | >50         | >50           | >50     | >50                                       | >50         | >50           | >50           | >50             | >50         | >50         |
| 1447                 | 62.1         | <b>17.0</b>                               | >50         | >50         | >50           | >50     | >50                                       | >50         | >50           | >50           | >50             | >50         | >50         |
| 1819                 | 62.1         | <b>16.4</b>                               | >50         | >50         | >50           | >50     | >50                                       | >50         | >50           | >50           | >50             | >50         | >50         |
| 1823                 | 62.1         | <b>8.9</b>                                | >50         | >50         | >50           | >50     | >50                                       | >50         | >50           | >50           | >50             | >50         | >50         |
| 1824                 | 62.1         | <b>6.7</b>                                | >50         | >50         | >50           | >50     | >50                                       | >50         | >50           | >50           | >50             | >50         | >50         |
| 1825                 | 62.1         | <b>2.8</b>                                | >50         | >50         | >50           | >50     | >50                                       | >50         | >50           | >50           | >50             | >50         | >50         |
| 1601                 | 36           | <b>3.3</b>                                | >50         | >50         | >50           | >50     | >50                                       | >50         | >50           | >50           | >50             | >50         | >50         |
| 1671                 | 36           | <b>6.3</b>                                | >50         | >50         | >50           | >50     | >50                                       | >50         | >50           | >50           | >50             | >50         | >50         |
| 1678                 | 36           | <b>9.9</b>                                | >50         | >50         | >50           | >50     | >50                                       | >50         | >50           | >50           | >50             | >50         | >50         |
| 1697                 | 36           | <b>1.9</b>                                | >50         | >50         | >50           | >50     | >50                                       | >50         | >50           | >50           | >50             | >50         | >50         |
| 1811                 | 36           | <b>10.7</b>                               | >50         | >50         | >50           | >50     | >50                                       | >50         | >50           | >50           | >50             | >50         | >50         |
| 2536                 | 36           | <b>7.1</b>                                | >50         | >50         | >50           | >50     | >50                                       | >50         | >50           | >50           | >50             | >50         | >50         |
| 2547                 | 36           | <b>21.8</b>                               | >50         | >50         | >50           | >50     | >50                                       | >50         | >50           | >50           | >50             | >50         | >50         |
| 2548                 | 36           | <b>3.0</b>                                | >50         | >50         | >50           | >50     | >50                                       | >50         | >50           | >50           | >50             | >50         | >50         |
| 2552                 | 36           | <b>4.8</b>                                | >50         | >50         | >50           | >50     | >50                                       | >50         | >50           | >50           | >50             | >50         | >50         |
| 2553                 | 36           | <b>8.2</b>                                | >50         | >50         | >50           | >50     | >50                                       | >50         | >50           | >50           | >50             | >50         | >50         |
| 2653                 | 36           | <b>0.8</b>                                | >50         | >50         | >50           | >50     | >50                                       | >50         | >50           | >50           | >50             | >50         | <b>41.7</b> |
| 1056                 | 54           | >50                                       | >50         | >50         | <b>18.867</b> | >50     | >50                                       | >50         | >50           | >50           | >50             | >50         | >50         |
| 1534                 | 54           | >50                                       | >50         | >50         | <b>14.445</b> | >50     | >50                                       | >50         | >50           | >50           | >50             | >50         | >50         |
| 1678_UCA             | 36           | >50                                       | >50         | >50         | >50           | >50     | >50                                       | >50         | >50           | >50           | >50             | >50         | >50         |
| 2548_UCA             | 36           | >50                                       | >50         | >50         | >50           | >50     | >50                                       | >50         | >50           | >50           | >50             | >50         | >50         |
| 1825_UCA             | 62.1         | >50                                       | >50         | >50         | >50           | >50     | >50                                       | >50         | >50           | >50           | >50             | >50         | >50         |
| 1518_ED <sup>2</sup> | 36           | <b>5.2</b>                                | >50         | >50         | >50           | >50     | >50                                       | >50         | >50           | >50           | >50             | >50         | >50         |
| 1518_EA              | -            | >50                                       | >50         | >50         | >50           | >50     | >50                                       | >50         | >50           | >50           | >50             | >50         | >50         |
| 1518_AA              | -            | >50                                       | >50         | >50         | >50           | >50     | >50                                       | >50         | >50           | >50           | >50             | >50         | >50         |
| CH59 <sup>3</sup>    | RV144        | <b>1.92</b>                               | >50         | >50         | >50           | >50     | >25                                       | >25         | >25           | >25           | >25             | >25         | >25         |
| CH31 <sup>3</sup>    | Pos. Control | <b>0.25</b>                               | <b>0.53</b> | <b>1.34</b> | <b>1.20</b>   | >25     | <b>0.10</b>                               | <b>0.02</b> | <b>0.05</b>   | <b>0.67</b>   | <b>1.83</b>     | <b>0.06</b> | <b>0.18</b> |

<sup>1</sup>Values are the mAb dilution at which relative luminescence units (RLUs) were reduced 50% compared to virus control wells (no test sample).

<sup>2</sup> 1518\_ED = wildtype; 1518\_EA = D51A mutant; 1518\_AA = E50A+D51A mutant

<sup>3</sup> Values for controls include those reported previously (Liao et al 2013)

Values in bold are considered positive for neutralizing antibody when compared against background

Color scale: Red: neutralization at <1 ug/ml; orange: <50 ug/ml

\* Virus has K169 present in V2

**Table S4. Candidate Orthologs of Relevant V Gene Segments and Nomenclature Mapping (Related to Fig. 4)**

**A**

| VL                    |            |         |
|-----------------------|------------|---------|
| Human                 | Rhesus     | Seq ID% |
| IGLV3-10              | IGLV3-17   | 96.8    |
| IGLV6-57              | IGLV6-92   | 93.8    |
| IGLV3-22 <sup>b</sup> | IGLV3-30   | 90.5    |
| VH                    |            |         |
| Human                 | Rhesus     | Seq ID% |
| IGHV3-23              | IGHV3-SC11 | 90.9    |
| IGHV4-59              | IGHV4-48   | 93.5    |
| IGHV4-b               | IGHV4-79   | 92.9    |
| IGHV4-b               | IGHV4-96   | 91.9    |
| IGHV5-51              | IGHV5-20   | 95.2    |
| IGHV3-9               | IGHV3-78   | 93.3    |

**B**

| Human    |          |          |                  | Rhesus Ortholog |            |          |                  |
|----------|----------|----------|------------------|-----------------|------------|----------|------------------|
| RV144 Ab | VH       | VL       | ED? <sup>a</sup> | NHP Ab          | VH         | VL       | ED? <sup>a</sup> |
| CH58     | IGHV5-51 | IGLV6-57 | Yes              | None            | IGHV5-20   | IGLV6-92 | No               |
| CH59     | IGHV3-9  | IGLV3-10 | Yes              | None            | IGHV3-78   | IGLV3-17 | Yes              |
| HG120    | IGHV3-23 | IGLV3-10 | Yes              | 1678            | IGHV3-SC11 | IGLV3-17 | Yes              |
| None     | IGHV4-59 | IGLV3-10 | Yes              | 1410            | IGHV4-48   | IGLV3-17 | Yes              |
| None     | IGHV4-b  | IGLV3-10 | Yes              | 975             | IGHV4-79   | IGLV3-17 | Yes              |
| None     | IGHV4-b  | IGLV3-10 | Yes              | 2536            | IGHV4-96   | IGLV3-17 | Yes              |

**Table S4. (cont.)**

**C**

| <b>VH</b>             |                                    |                |
|-----------------------|------------------------------------|----------------|
| <b>Rhesus Library</b> | <b>Sundling et al.<sup>c</sup></b> | <b>Seq ID%</b> |
| IGHV3-SC11            | IGHV3.58                           | 100            |
| IGHV4-48              | IGHV4.22                           | 100            |
| IGHV4-79              | IGHV4.34                           | 100            |
| IGHV4-96              | IGHV4.38                           | 100            |
| IGHV2-33              | IGHV2.12                           | 100            |
| IGHV3-108             | IGHV3.44                           | 100            |
| IGHV3-SC13            | IGHV3.54                           | 100            |
| IGHV3-SC9             | IGHV3.15                           | 99.3           |
| IGHV4-100             | IGHV4.40                           | 100            |
| IGHV4-97              | IGHV4.39                           | 100            |
| IGHV5-117             | IGHV5.46                           | 100            |
| IGHV5-20              | IGHV5.7                            | 100            |
| IGHV3-78              | IGHV3.33                           | 100            |
| <b>VL</b>             |                                    |                |
| <b>Rhesus Library</b> | <b>Sundling et al.<sup>c</sup></b> | <b>Seq ID%</b> |
| IGLV3-17              | IGLV3.4                            | 100            |
| IGLV6-92              | IGLV6.40                           | 100            |
| IGLV3-30              | IGLV3.12                           | 100            |
| IGLV1-48              | IGLV1.19                           | 100            |
| IGLV2-118             | IGLV2.59                           | 100            |
| IGLV1-67              | IGLV1.30                           | 97.3           |
| IGLV1-45              | IGLV1.16                           | 100            |
| IGLV2-117             | IGLV2.58                           | 100            |
| IGLV3-SC6             | IGLV3.45                           | 100            |
| IGKV1-LC1g            | IGKV1.27                           | 100            |
| IGKV2-118             | IGKV2.59                           | 100            |
| IGKV2-73              | IGKV2.38                           | 99.3           |

a. Columns denote whether rhesus or human VL gene encodes for the LCDR2 ED motif

b. IGLV3-22 has putative dominant non-functional allele (see text for details)

c. Mapping of rhesus repertoire V gene nomenclature described here to nomenclature previously described (Sundling et al. 2012)

**Table S5. Data collection and refinement statistics for CH59-UA (Related to Fig 6)**

| Structure                                                             | CH59-UA                      |
|-----------------------------------------------------------------------|------------------------------|
| <b>Data collection</b>                                                |                              |
| Space group:                                                          | P2 <sub>1</sub> <sup>a</sup> |
| <i>Cell dimensions</i>                                                |                              |
| a, b, c (Å):                                                          | 76.3, 70.8, 107.3            |
| α, β, γ (°):                                                          | 90.0, 96.8, 90.0             |
| Resolution (Å):                                                       | 50-2.4 (2.44-2.40)           |
| R <sub>merge</sub> (%):                                               | 9.0 (36.0) <sup>b</sup>      |
| <I/σ>                                                                 | 17.2 (3.1)                   |
| Completeness (%):                                                     | 99.7 (98.4)                  |
| Redundancy:                                                           | 3.6 (3.1)                    |
| <b>Refinement</b>                                                     |                              |
| Total # reflections:                                                  | 44692                        |
| Unique # reflections:                                                 | 41986                        |
| R <sub>work</sub> / R <sub>free</sub> (%):                            | 18.2 / 22.9 (21.2 / 27.1)    |
| Average B factor (Å <sup>2</sup> ):                                   | 35.04                        |
| Nonhydrogen atoms <sup>c</sup> :                                      | 6369+72 <sup>d</sup>         |
| Water molecules:                                                      | 204                          |
| <b>R.M.S. deviations</b>                                              |                              |
| Bond lengths (Å):                                                     | 0.006                        |
| Bond angles (°):                                                      | 1.068                        |
| ψ, φ favored (%):                                                     | 97.1                         |
| ψ, φ allowed (%):                                                     | 2.8                          |
| ψ, φ outlying (%):                                                    | 0.1                          |
| <i>a These crystals had two Fabs in the asymmetric unit.</i>          |                              |
| <i>b Values in parentheses are for the highest resolution shells.</i> |                              |
| <i>c Not including water molecules.</i>                               |                              |
| <i>d Protein atoms, plus 72 organic molecule and ion atoms.</i>       |                              |

**Table S6. Rhesus PCR Primers (Related to Fig. 1)**

| RT primers  |                          |
|-------------|--------------------------|
| Oligoname   | Oligosequence(5'to3')    |
| RhlgG_RTV4  | TCTTGTCACCTTGGTGTTG      |
| RhlgM-RTV4  | TGAATTTCCAGGAGAAAGTGATG  |
| RhlgA_RTV4  | TGTTTCCRGATTTTGAGATGGTG  |
| RhlgD_RTV4  | AAGGTCTTCTCCTTGCTTGATC   |
| RhlgE_RTV4  | TTGGAATCTGCACACTTCTTG    |
| RhCK_RTV6   | TCTCTGGGATAGAAGTTATTGAG  |
| RhCL_RTV6   | CTTGTTGTTGCTCTGTTTGGAG   |
| RhlgA_EXTV5 | GAAGAAGCCCTGGACCAGGCAGGC |
| RhlgG-EXTV5 | AAGGTGTGCACGCCGCTGGTCAG  |
| RhlgM_EXTV5 | GTCGGGAAGGAAGTCTGTGCGAGG |
| RhlgD_EXTV5 | TCCCAGGTGCCAGGTGACAGTCAC |
| RhlgE_EXTV5 | ACGGTCAGCAAGCTGATGGTGGCA |

| PCRa Heavy Chain Primers |                                 |
|--------------------------|---------------------------------|
| Oligoname                | Oligosequence(5'to3')           |
| RHIGVH1+7_EXT1           | CACCATGGACTGGACCTGGAGGMTCTC     |
| RHIGVH1+7_EXT2           | CACCATGGACCTGACCCGGAGGATCCTTTTC |
| RHIGVH2_EXT              | CACCATGGACACGCTTTGCTCCACRCTC    |
| RHVH3_EXT1_N             | CATGGAGTTgGGGCTGAGCTGGGTYTTCC   |
| RHVH3_EXT2_N             | CATGGAGTTgGGGCTGAGYTGGGTTTTCC   |
| RHVH3_EXT3_N             | CATGGAGTTTGGGCTGAGCTGGR         |
| RHVH3_EXT4_N             | CATGGAGTTTGGGCTGAGCTKGGTTTTYC   |
| RHVH4_EXT1_N             | ACCATGAAGCACCTGTGGTTCTBCCTCCTCC |
| RHVH4_EXT2_N             | CACCATGAAGCACCTGKGGTTCTTY       |
| RHIGVH5_EXT              | CACCATGGGGTCAACTGCCMTCTC        |
| RHIGVH6_EXT              | CCATGCTGTCTCCTTCCATCGTCC        |

| PCRa Kappa Chain Primers |                                   |
|--------------------------|-----------------------------------|
| Oligoname                | Oligosequence(5'to3')             |
| RhCK_EXTV7               | ACCTGATCCTCAGATGGCGGGAAGATG       |
| RHIGVK1_EXT1_N           | CACCATGGACATGAGGGYCCC             |
| RHIGVK1_EXT2_N           | CACCATGGACATGAGGGTCCCCAGTC        |
| RHIGVK1_EXT3_N           | CACCATGGACATGAGGGTCCCCGGTtAIC     |
| RHIGVK1_EXT4_N           | CACCATGGACATGAGGGTCTCCTGGTCCAG    |
| RHIGVK1_EXT5_N           | CACCATGGACATGAGGGTCCCCGGTCCAGCTYC |
| RHIGVK2_EXT1_N           | CACCATGAGGCTCCCWGTCTCAG           |
| RHIGVK2_EXT2_N           | CACCATGAGGCTCCCTGCTCAGCTYCTGGGGC  |
| RHIGVK3_EXT1_N           | CACCATGGAAGCCCCAGCTCRGCTTCTC      |
| RHIGVK3_EXT2_N           | CACCATGGAAGCCCCAGCACAGCTTCTC      |
| RHIGVK4_EXT              | CACCATGGTGTACAGACCCAGWCTTC        |
| RHIGVK5_EXT              | CACCATGGGATCCCAGGTTCACTCCTCAG     |
| RHIGVK6_EXT1             | CACCATGGTGTCCCCATTGCAACTCCTG      |
| RHIGVK6_EXT2             | CACCATGtGTtCCATCACAACTCATtG       |
| RHIGVK7_EXT              | CACCATGGGGTCTGGGCTCCTTCTCCTG      |

| PCRa Lambda Chain Primers |                                |
|---------------------------|--------------------------------|
| Oligoname                 | Oligosequence(5'to3')          |
| RhCL_EXTV7                | TGCCATCTGCCTTCCAGGCCACTT       |
| RHIGVL1_EXT1              | CACCATGGCCTGGTCTCCTCTCSTCCTCAC |
| RHIGVL1_EXT2              | CACCATGGCCTGGTCTCCTCTCCTCTC    |
| RHIGVL2_EXT               | CACCATGGCCTGGGCTCTGSTCCTC      |
| RHIGVL3_EXT1              | CACCATGGCCGGGACCCYCTCCTCCTC    |
| RHIGVL3_EXT2_N            | CACCATGGCCTGGACCCTGTTCTGCTC    |
| RHIGVL3_EXT3              | CACCATGGCCTGGACCCcTCcCCTRCTC   |
| RHIGVL4_EXT               | CACCATGGCCTGGACCCACTCCTCCTC    |
| RHIGVL5_EXT               | CACCATGGCCTGGACTCYTCTC         |
| RHIGVL6_EXT               | CACCATGGCCTGGGCTCCACTCCTCCTC   |
| RHIGVL7_EXT               | CACCATGGCCTGGACTCTGCTCCTCCTCC  |
| RHIGVL8_EXT               | CACCATGGCCTGGATGATGCTTCTCCTCG  |
| RHIGVL11_EXT              | CACCATGGCCCTGACTCCTCTCCTCCTC   |

| PCRB Heavy Chain Primers |                                                            |
|--------------------------|------------------------------------------------------------|
| Oligoname                | Oligosequence(5'to3')                                      |
| RhlgA_ACD_IntV20         | CAGGGCCGCTGTGCTCTCGGAGGTGCTCCTGCCCTCGAGGCTCAGCGGGAAGAC     |
| RhlgA_BC_IntV20          | CAGGGCCGCTGTGCTCTCGGAGGTGCTCCTGCTGCAGAGGYTCAGCGGGAAGAC     |
| RhlgG_IntV20             | CAGGGCCGCTGTGCTCTCGGAGGTGCTCCTGGAG                         |
| RhlgM_IntV20             | CAGGGCCGCTGTGCTCTCGGAGGTGCTCCTCTCACAGGAGACGAGGGGGAAAAG     |
| RhlgD_IntV20             | CAGGGCCGCTGTGCTCTCGGAGGTGCTCCTGTTATCCTTTGGGAGTTGGCAGC_GCTG |
| RhlgE_IntV20             | CAGGGCCGCTGTGCTCTCGGAGGTGCTCCTGCAGCAGGGGATCAAGGGGAAGAC     |
| RHIGVH1+7_INT1           | CCAAGCTGGCTAGCACCATGGACTGGACCTGGAGGTCCTC                   |
| RHVH1+7_INT2_N           | CCAAGCTGGCTAGCACCATGGACcTSAcccGGAGSATCCTtTC                |
| RHIGVH2_INT              | CCAAGCTGGCTAGCACCATGGACACGCTTTGCTCCAC                      |
| RHVH3_INT1_N             | CCAAGCTGGCTAGCACCATGGAGTTGGGGCTGAGYTG                      |
| RHVH3_INT2_N             | CCAAGCTGGCTAGCACCATGGAGTTTGGGCTGAGCTKG                     |
| RHVH4_INT_N              | CCAAGCTGGCTAGCACCATGAAGCACCTGKGGTTC                        |
| RHIGVH5_INT              | CCAAGCTGGCTAGCACCATGGGGTCAACTGCCMTCCTC                     |
| RHIGVH6_INT              | CCAAGCTGGCTAGCACCATGTCTGTCTCCTCCTCATCGTC                   |

| PCRB Kappa Chain Primers |                                         |
|--------------------------|-----------------------------------------|
| Oligoname                | Oligosequence(5'to3')                   |
| RhCK_IntV6               | TGGCGGGAAGATGAAGACAGATGGTG              |
| RHIGVK1_INT1_N           | CCAAGCTGGCTAGCACCATGGACATGAGGGYCCC      |
| RHIGVK1_INT2_N           | CCAAGCTGGCTAGCACCATGGACATGAGGGTCYCCG    |
| RHIGVK2_INT1_N           | CCAAGCTGGCTAGCACCATGAGGCTCCCWGCTC       |
| RHIGVK3_INT1_N           | CCAAGCTGGCTAGCACCATGGAAGCCCCAGCWC       |
| RHIGVK4_INT              | CCAAGCTGGCTAGCACCATGGTGTACAGACCCAAG     |
| RHIGVK5_INT              | CCAAGCTGGCTAGCACCATGGGATCCCAGTTCACTCC   |
| RHIGVK6_INT1             | CCAAGCTGGCTAGCACCATGGTGTCCCATTCGAACTC   |
| RHIGVK6_INT2             | CCAAGCTGGCTAGCACCATGTTGTCTCCATCACAACCTC |
| RHIGVK7_INT              | CCAAGCTGGCTAGCACCATGGGGTCTGGGCTCCTTTCC  |

| PCRB Lambda Chain Primers |                                        |
|---------------------------|----------------------------------------|
| Oligoname                 | Oligosequence(5'to3')                  |
| RhCL_IntV6                | GTCACTGATCAGACACACTAGTGTGG             |
| RHIGVL1_INT               | CCAAGCTGGCTAGCACCATGGCCTGGTCTCCTCTC    |
| RHIGVL2_INT               | CCAAGCTGGCTAGCACCATGGCCTGGGCTCTGSTCC   |
| RHIGVL3_INT1_N            | CCAAGCTGGCTAGCACCATGGCCGGGACCCYTC      |
| RHIGVL3_INT2_N            | CCAAGCTGGCTAGCACCATGGCCtGGACCCCTS      |
| RHIGVL4_INT_N             | CCAAGCTGGCTAGCACCATGGCCTGGACCCCACTCC   |
| RHIGVL5_INT               | CCAAGCTGGCTAGCACCATGGCCTGGACTCYTCTC    |
| RHIGVL6_INT_N             | CCAAGCTGGCTAGCACCATGGCCTGGGCTCCACTC    |
| RHIGVL7_INT               | CCAAGCTGGCTAGCACCATGGCCTGGACTCTGCTCCTC |
| RHIGVL8_INT               | CCAAGCTGGCTAGCACCATGGCCTGGATGATGCTTCTC |
| RHIGVL11_INT              | CCAAGCTGGCTAGCACCATGGCCTGACTCCTCTCCTC  |

| Sequencing Primers |                       |
|--------------------|-----------------------|
| Oligoname          | Oligosequence(5'to3') |
| RHVHKLSEQ_F        | CCAAGCTGGCTAGCACCATG  |
| RHVHSEQ_R          | CTGTGCTCTCGGAGGTGCTC  |
| RHVKSEQ_R          | GGAAGATGAAGACAGATGGTG |
| RHVLSEQ_R          | TGATCAGACACACTAGTGTGG |

## Supplemental Experimental Procedures

### *Sequence Analysis*

An annotated rhesus repertoire library consisting of VH, DH, JH, VK, JK, V $\lambda$  and J $\lambda$  gene segments was used for both rhesus ortholog analysis and inference of VDJ rearrangements. This library was obtained by searching the sequence data for the NCBI *Macaca mulatta* whole genome sequencing project rather than the assembled genome. We used human gene segments as search queries, and examined all retrieved hits for functionality, retaining only those sequences with intact codons for the invariant residues, intact RS sequences, and without stop codons. These sequences were supplemented by sequences obtained from the King's College database ([http://www.kcl.ac.uk/immunobiology/Mac\\_ig/](http://www.kcl.ac.uk/immunobiology/Mac_ig/)). Duplicate sequences were discarded, and judgments based on similarity were made as to whether sequences were related as alleles or distinct gene segments. Nomenclature of the rhesus V gene segments of this library differ from a previous characterization of the rhesus repertoire (Sundling et al., 2012) and a mapping to the Sundling et al. nomenclature for the relevant V genes observed in this study is provided in Table S4C. The term “ortholog” is used throughout this paper to reflect putative orthology representative of high sequence identity between a pair of genes that belong to a class of genes of shared functionality. Identification of orthology between human and rhesus Ig genes was performed by searching for high sequence identity matches between the rhesus repertoire library and human Ig genes from the IMGT database (Lefranc, 2001). The V(D)J arrangements of rhesus antibodies were inferred using a Bayesian inference method as previously described (Kepler, 2013; Munshaw and Kepler, 2010).



The BLAT web server (Kent, 2002; Kuhn et al., 2013) was used to search for orthologs of human IGLV3-10 in the following primate genomes: *Microcebus murinus* (Lindblad-Toh et al., 2011), *Otolemur garnettii* (OtoGar3 assembly: <http://www.ncbi.nlm.nih.gov/assembly/396188>) (Lindblad-Toh et al., 2011), *Tarsius syrichta* (TarSyr1 assembly: <http://www.ncbi.nlm.nih.gov/assembly/64501>) (Lindblad-Toh et al., 2011), *Callithrix jacchus* (CalJac3 assembly: <http://www.ncbi.nlm.nih.gov/assembly/6608>) , *Saimiri boliviensis* (SaiBol1.0 assembly: <http://www.ncbi.nlm.nih.gov/assembly/420378>), *Macaca mulatta* (Gibbs et al., 2007), *Papio anubis* (Panu\_2.0 assembly: <http://www.ncbi.nlm.nih.gov/assembly/399268>) , *Nomascus leucogenys* (Nleu\_3.0 assembly: <http://www.ncbi.nlm.nih.gov/assembly/506498>), *Pongo abelii* (Locke et al., 2011), *Pan troglodytes* (PanTro4 assembly: <http://www.ncbi.nlm.nih.gov/assembly/255628>) (Consortium, 2005), and *Gorilla gorilla* (Sally et al., 2012). In addition, we used BLAST with human IGLV3-10 as the query against the RefSeq genomic database (Pruitt et al., 2014) to search for orthologs in *Pan paniscus* because the genome assembly of *Pan paniscus* (Prufer et al., 2012) was not yet available through the BLAT web server.

## **Molecular Modeling**

Threading was accomplished using the Rosetta protein modeling software package (Leaver-Fay et al., 2011) . For the structural model of ab975 in complex with V2, the sequence of ab975 heavy and light chains were threaded independently onto a template of the CH59 structure over 1000 iterations. The top scoring heavy and light chain models were then combined onto the joint template of the CH59 Fab structure in complex with V2. This model was further refined and underwent energy minimization using the AMBER ff03 force field (Case

et al., 2005; Duan et al., 2003). For the structural model of rhesus IGHV3-78 and IGLV3-17, the germline IGHV3-78 sequence was concatenated to the CH59-UA HCDR3 and heavy chain framework 4 sequence and threaded onto a template of the CH59-UA heavy chain structure. Next, the germline IGLV3-17 sequence was concatenated to the CH59-UA LCDR3 and light chain framework 4 sequences and threaded onto a template of the CH59-UA light chain. Threading for each chain was run for 1000 iterations and the top model for each selected and combined onto the joint template of the CH59-UA Fab structure. Lastly the model was superposed onto the CH59-V2 complex and the V2 coordinates transferred thus positioning the V2 peptide in the CH59 binding orientation within the binding site of the IGHV3-78/IGLV3-17 model.

### Supplemental References

- Case, D.A., Cheatham, T.E., 3rd, Darden, T., Gohlke, H., Luo, R., Merz, K.M., Jr., Onufriev, A., Simmerling, C., Wang, B., and Woods, R.J. (2005). The Amber biomolecular simulation programs. *J Comput Chem* 26, 1668-1688.
- Consortium, C.S.a.A. (2005). Initial sequence of the chimpanzee genome and comparison with the human genome. *Nature* 437, 69-87.
- Duan, Y., Wu, C., Chowdhury, S., Lee, M.C., Xiong, G., Zhang, W., Yang, R., Cieplak, P., Luo, R., Lee, T., *et al.* (2003). A point-charge force field for molecular mechanics simulations of proteins based on condensed-phase quantum mechanical calculations. *J Comput Chem* 24, 1999-2012.
- Gibbs, R.A., Rogers, J., Katze, M.G., Bumgarner, R., Weinstock, G.M., Mardis, E.R., Remington, K.A., Strausberg, R.L., Venter, J.C., Wilson, R.K., *et al.* (2007). Evolutionary and biomedical insights from the rhesus macaque genome. *Science* 316, 222-234.
- Kent, W.J. (2002). BLAT--the BLAST-like alignment tool. *Genome Res* 12, 656-664.
- Kepler, T.B. (2013). Reconstructing a B-cell clonal lineage. I. Statistical inference of unobserved ancestors. *F1000Res* 2, 103.
- Kuhn, R.M., Haussler, D., and Kent, W.J. (2013). The UCSC genome browser and associated tools. *Brief Bioinform* 14, 144-161.
- Leaver-Fay, A., Tyka, M., Lewis, S.M., Lange, O.F., Thompson, J., Jacak, R., Kaufman, K., Renfrew, P.D., Smith, C.A., Sheffler, W., *et al.* (2011). ROSETTA3: an object-oriented software suite for the simulation and design of macromolecules. *Methods Enzymol* 487, 545-574.
- Lefranc, M.P. (2001). IMGT, the international ImMunoGeneTics database. *Nucleic Acids Res* 29, 207-209.
- Lindblad-Toh, K., Garber, M., Zuk, O., Lin, M.F., Parker, B.J., Washietl, S., Kheradpour, P., Ernst, J., Jordan, G., Mauceli, E., *et al.* (2011). A high-resolution map of human evolutionary constraint using 29 mammals. *Nature* 478, 476-482.

Locke, D.P., Hillier, L.W., Warren, W.C., Worley, K.C., Nazareth, L.V., Muzny, D.M., Yang, S.P., Wang, Z., Chinwalla, A.T., Minx, P., *et al.* (2011). Comparative and demographic analysis of orang-utan genomes. *Nature* 469, 529-533.

Munshaw, S., and Kepler, T.B. (2010). SoDA2: a Hidden Markov Model approach for identification of immunoglobulin rearrangements. *Bioinformatics* 26, 867-872.

Prufer, K., Munch, K., Hellmann, I., Akagi, K., Miller, J.R., Walenz, B., Koren, S., Sutton, G., Kodira, C., Winer, R., *et al.* (2012). The bonobo genome compared with the chimpanzee and human genomes. *Nature* 486, 527-531.

Pruitt, K.D., Brown, G.R., Hiatt, S.M., Thibaud-Nissen, F., Astashyn, A., Ermolaeva, O., Farrell, C.M., Hart, J., Landrum, M.J., McGarvey, K.M., *et al.* (2014). RefSeq: an update on mammalian reference sequences. *Nucleic Acids Res* 42, D756-763.

Scally, A., Dutheil, J.Y., Hillier, L.W., Jordan, G.E., Goodhead, I., Herrero, J., Hobolth, A., Lappalainen, T., Mailund, T., Marques-Bonet, T., *et al.* (2012). Insights into hominid evolution from the gorilla genome sequence. *Nature* 483, 169-175.

Sundling, C., Li, Y., Huynh, N., Poulsen, C., Wilson, R., O'Dell, S., Feng, Y., Mascola, J.R., Wyatt, R.T., and Karlsson Hedestam, G.B. (2012). High-resolution definition of vaccine-elicited B cell responses against the HIV primary receptor binding site. *Sci Transl Med* 4, 142ra196.
